# Supplementary material for: Dynamic genomic architecture of mutualistic cooperation in a wild population of Mesorhizobium
Source: PubMed Central journal article supplement (PMC6331556; doi:10.1038/s41396-018-0266-y), 2018-09-14
Supplement: 41396_2018_266_MOESM5_ESM.pdf [file 41396_2018_266_MOESM5_ESM.pdf]

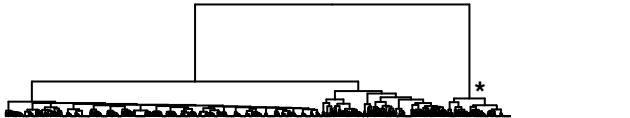

- NJ9
- NJ5
- NJ3
- NJ11
- NM5
- SH8
- M.amorphae*
- M.loti*
- SM2
- M.opportunus*
- SJ7
- M.ciceri*
- M.australicum*
- M.alhagi*
- SH4
- SM7
- SH5
- SH6
- SH7
- SH3
- NH4
- NH1
- NH2
- NH6
- NJ10
- SM4
- NH3
- NH5
- SM6
- SM1
- SM3
- SM5
- SJ2
- SH1
- NJ2
- NJ1
- SH10
- SH9
- NM1
- NJ7
- NM3
- SJ3
- NJ12
- SJ8
- NM4
- SJ1
- SJ4
- SJ6
- SJ5
- NM2
- SH2
- NJ8
- NJ6
- NJ4

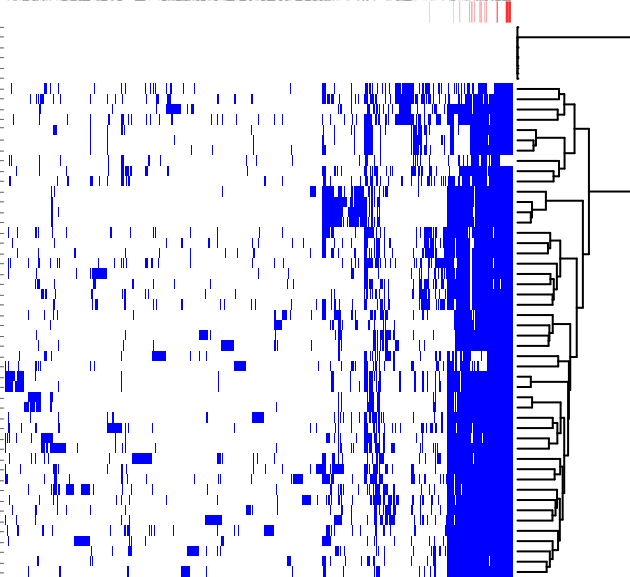

Candidate HGT Genes
