# Supplementary material for: Dynamic genomic architecture of mutualistic cooperation in a wild population of Mesorhizobium
Source: PubMed Central journal article supplement (PMC6331556; doi:10.1038/s41396-018-0266-y), 2018-09-14
Supplement: 41396_2018_266_MOESM11_ESM.pdf [file 41396_2018_266_MOESM11_ESM.pdf]

| All Strains(n=54) | Focal_SI+(n=32) | Nonfocal_SI+(n=) | Focal_SI-(n=6) | ref spp.(n=6) | Seq. Accession      | Seq. Description                           |
|-------------------|-----------------|------------------|----------------|---------------|---------------------|--------------------------------------------|
| <b>70.37</b>      | <b>100</b>      | <b>0</b>         | <b>100</b>     | <b>0</b>      | <b>denovo000891</b> | <b>glycosyl transferase</b>                |
| 3.7               | 3.13            | 10               | 0              | 0             | denovo003427        | external scaffolding protein d             |
| 5.56              | 6.25            | 10               | 0              | 0             | denovo003428        | protein b                                  |
| 5.56              | 6.25            | 10               | 0              | 0             | denovo003434        | major spike protein g                      |
| 5.56              | 6.25            | 10               | 0              | 0             | denovo003435        | major spike protein g                      |
| 5.56              | 6.25            | 10               | 0              | 0             | denovo003439        | external scaffolding protein d             |
| 1.85              | 0               | 10               | 0              | 0             | denovo007925        | two-component response regulator           |
| 1.85              | 0               | 10               | 0              | 0             | denovo007926        | response regulator                         |
| 3.7               | 0               | 20               | 0              | 0             | denovo008733        | glycosyl transferase                       |
| 5.56              | 0               | 20               | 0              | 16.67         | denovo009144        | sulfate large subunit                      |
| 7.41              | 0               | 20               | 0              | 33.33         | denovo009145        | sulfate large subunit                      |
| 7.41              | 0               | 20               | 0              | 33.33         | denovo009146        | sulfate large subunit                      |
| 1.85              | 0               | 10               | 0              | 0             | denovo009629        | two-component response regulator           |
| 1.85              | 3.13            | 0                | 0              | 0             | denovo011176        | feruloyl esterase                          |
| 1.85              | 3.13            | 0                | 0              | 0             | denovo012323        | external scaffolding protein d             |
| 7.41              | 12.5            | 0                | 0              | 0             | denovo012571        | feruloyl esterase                          |
| 1.85              | 0               | 10               | 0              | 0             | denovo013321        | transcriptional regulator protein          |
| 1.85              | 3.13            | 0                | 0              | 0             | denovo013967        | feruloyl esterase                          |
| 22.22             | 0               | 100              | 0              | 33.33         | GI:13472855         | hypothetical protein mll3280               |
| <b>100</b>        | <b>100</b>      | <b>100</b>       | <b>100</b>     | <b>100</b>    | <b>GI:13474136</b>  | <b>nodF</b>                                |
| <b>100</b>        | <b>100</b>      | <b>100</b>       | <b>100</b>     | <b>100</b>    | <b>GI:13474137</b>  | <b>nodE</b>                                |
| <b>79.63</b>      | <b>71.88</b>    | <b>100</b>       | <b>66.67</b>   | <b>100</b>    | <b>GI:13474849</b>  | <b>hypothetical protein msr8740</b>        |
| 3.7               | 0               | 10               | 0              | 16.67         | GI:13475164         | noI                                        |
| 3.7               | 0               | 0                | 0              | 33.33         | GI:13475296         | noIX                                       |
| 5.56              | 0               | 0                | 0              | 50            | GI:13475297         | noIW                                       |
| 5.56              | 0               | 0                | 0              | 50            | GI:13475299         | noIT                                       |
| 5.56              | 0               | 0                | 0              | 50            | GI:13475300         | noIU                                       |
| 5.56              | 0               | 0                | 0              | 50            | GI:13475301         | noIV                                       |
| <b>100</b>        | <b>100</b>      | <b>100</b>       | <b>100</b>     | <b>100</b>    | <b>GI:13476217</b>  | <b>hemolysin-like protein</b>              |
| <b>100</b>        | <b>100</b>      | <b>100</b>       | <b>100</b>     | <b>100</b>    | <b>GI:13476292</b>  | <b>sulfate adenyltransferase subunit 2</b> |
| <b>98.15</b>      | <b>100</b>      | <b>100</b>       | <b>100</b>     | <b>83.33</b>  | <b>GI:13476293</b>  | <b>adenylsulfate kinase protein</b>        |
| <b>100</b>        | <b>100</b>      | <b>100</b>       | <b>100</b>     | <b>100</b>    | <b>GI:13476514</b>  | <b>nodG</b>                                |
| 1.85              | 0               | 0                | 0              | 16.67         | GI:161621456        | hypothetical protein mlr9393               |
|                   |                 |                  |                |               |                     |                                            |
|                   |                 |                  |                |               |                     |                                            |
